# Supplementary material for: Machine Learning-Based Early Prediction of Sepsis Using Electronic Health Records: A Systematic Review
Source: MDPI journal article supplement (doi:10.3390/jcm12175658), 2023-08-30
Supplement: s1 [file s1]

## Supplementary Materials

**Supplementary Table S1:** Different classical ML and DL models commonly used in the early prediction of sepsis

| Type                 | Machine Learning Model                    | Description                                                                                                                                                                                                                                                 |
|----------------------|-------------------------------------------|-------------------------------------------------------------------------------------------------------------------------------------------------------------------------------------------------------------------------------------------------------------|
| Classical ML Models  | Decision Trees (DT)                       | Decision Trees (DT) are hierarchical models that use a series of binary decisions to classify or predict outcomes based on input features.                                                                                                                  |
|                      | Random Forest (RF)                        | Random Forest (RF) is an ensemble machine learning algorithm that builds multiple decision trees and combines their predictions to improve accuracy and robustness.                                                                                         |
|                      | Support Vector Machine (SVM)              | Support Vector Machine (SVM) is a supervised machine learning algorithm that aims to classify data points by finding the optimal hyperplane that maximizes the separation between different classes.                                                        |
|                      | Logistic Regression (LR)                  | Logistic Regression (LR) is a statistical method used for binary classification, predicting the probability of an outcome based on input features.                                                                                                          |
|                      | Gradient Boosting (GB)                    | Gradient Boosting (GB) is a machine learning ensemble technique that builds a strong predictive model by combining multiple weak learners in a sequential manner.                                                                                           |
|                      | Naïve Bayes (NB)                          | Naïve Bayes (NB) is a probabilistic machine learning algorithm used for classification tasks, based on Bayes' theorem and the assumption of feature independence.                                                                                           |
|                      | k-Nearest Neighbor (kNN)                  | K-Nearest Neighbors (KNN) is a supervised machine learning algorithm that classifies data points based on the majority class of their k closest neighbors in the feature space.                                                                             |
| Deep Learning Models | Recurrent Neural Network (RNN)            | A Recurrent Neural Network (RNN) is a type of artificial neural network designed to effectively process sequential and time-dependent data by maintaining memory of previous inputs.                                                                        |
|                      | Long Short-Term Memory networks (LSTM)    | Long Short-Term Memory networks (LSTM) are a type of recurrent neural network (RNN) architecture designed to effectively capture and process sequential data, particularly well-suited for tasks involving memory and context preservation.                 |
|                      | Convolutional Neural Network (CNN)        | A Convolutional Neural Network (CNN) is a deep learning architecture designed for image and spatial data processing, utilizing convolutional layers to automatically learn hierarchical features from input data.                                           |
|                      | Gated Recurrent Unit (GRU)                | Gated Recurrent Unit (GRU) is a type of recurrent neural network (RNN) architecture used in machine learning for sequence modeling, designed to capture and utilize long-range dependencies in data sequences while mitigating vanishing gradient problems. |
|                      | Neural Network (NN)                       | A neural network (NN) is a computational model inspired by the structure and functioning of the human brain, used for various tasks such as pattern recognition and data analysis.                                                                          |
|                      | Multitask Gaussian Process and Attention- | MGP-AttTCN is a hybrid model combining Multitask Gaussian Process and Attention-based Deep Learning techniques for predictive tasks.                                                                                                                        |

|  |                                        |                                                                                                                                                                                                                             |
|--|----------------------------------------|-----------------------------------------------------------------------------------------------------------------------------------------------------------------------------------------------------------------------------|
|  | based Deep Learning Model (MGP-AttTCN) |                                                                                                                                                                                                                             |
|  | Temporal Convolutional Network (TCN)   | A Temporal Convolutional Network (TCN) is a deep learning architecture designed for sequence data processing, utilizing convolutional layers to capture temporal patterns and dependencies.                                 |
|  | CNN-LSTM                               | CNN-LSTM is a hybrid neural network architecture that combines Convolutional Neural Networks (CNNs) and Long Short-Term Memory (LSTM) networks for sequential data analysis, leveraging both spatial and temporal features. |
|  | CNN-GRU                                | CNN-GRU stands for Convolutional Neural Network - Gated Recurrent Unit, a hybrid model combining CNN and GRU architectures for sequential data processing with convolutional and recurrent layers.                          |

**Supplementary Table S2:** Performance metrics used to interpret results

| Measure                                                                    | Description                                                                                                                                                                                                         |
|----------------------------------------------------------------------------|---------------------------------------------------------------------------------------------------------------------------------------------------------------------------------------------------------------------|
| Area under curve (AUC) or AUROC (Receiver Operating Characteristics Curve) | Area representing the discriminative power of a test between 0.5 (no discrimination) and 1 (perfect discrimination).                                                                                                |
| Sensitivity (Recall)                                                       | The proportion of affected cases with a positive test result (i.e., a true positive) in reference to all affected cases                                                                                             |
| Specificity                                                                | The proportion of non-affected cases with a negative test result (i.e., true negative) in reference to all non-affected cases                                                                                       |
| Accuracy                                                                   | Accuracy is a statistical metric that measures the proportion of correct predictions made by a model out of all predictions.                                                                                        |
| Precision                                                                  | Precision is a statistical metric that measures the accuracy of positive predictions made by a model.                                                                                                               |
| F1 Score                                                                   | The F1 score is a single metric that balances precision and recall for binary classification tasks.                                                                                                                 |
| Matthews Correlation Coefficient (MCC)                                     | Matthews Correlation Coefficient (MCC) is a statistical measure that assesses the quality of binary classification predictions, considering true positive, true negative, false positive, and false negative rates. |
| Mean Average Precision (mAP)                                               | Mean Average Precision (mAP) is a performance metric used to assess the precision and accuracy of information retrieval systems, particularly in scenarios involving ranked search results.                         |
| Positive Predictive Value (PPV)                                            | Positive Predictive Value (PPV) is the proportion of true positive cases among the total predicted positive cases in a diagnostic test or model.                                                                    |
| Negative Predictive Value (NPV)                                            | Negative Predictive Value (NPV) is a statistical measure that indicates the proportion of true negatives among all negative test results.                                                                           |
| Positive likelihood ratio (PLR)                                            | The probability of a true positive test result divided by the probability of a false positive result, with 1 as the lowest limit                                                                                    |
| Negative likelihood ratio (NLR)                                            | The probability of a false negative test result divided by the probability of a true negative test result, with 1 as a lower limit                                                                                  |

### Search strategy

A comprehensive literature retrieval is conducted in PubMed, Google Scholar, IEEEExplore and Scopus for papers published between Jun 2016 and Feb 2023. Keywords like sepsis/machine learning/prediction are used for the search.

**Supplementary Table S3:** A literature retrieval strategy for sepsis prediction

| Databases      | Search strategy                                                                                                                                                                         |
|----------------|-----------------------------------------------------------------------------------------------------------------------------------------------------------------------------------------|
| PubMed         | ((Sepsis [Title/Abstract] ) AND (prediction [All Fields]) AND ((machine learning [Title/Abstract]) OR (deep learning [Title/Abstract])) )                                               |
| Google Scholar | Title, abstract, keywords: sepsis, machine learning, predict                                                                                                                            |
| IEEEExplore    | (sepsis) AND ((machine learning) OR (deep learning) OR (prediction) OR (electronic health record))                                                                                      |
| Scopus         | Sepsis [Article title] AND prediction [Article title, Abstract, Keywords] AND machine learning [Article title, Abstract, Keywords] OR deep learning [Article title, Abstract, Keywords] |

All the included papers are perused by two independent reviewers (KRI and JP), including title-abstract and full text. All disagreements between the two authors are resolved by a third author (MSIS). The chosen papers are limited to languages in English.

**Supplementary Table S4:** PICOS criteria for the systematic review

| Parameter     | Inclusion Criteria                                                                                                                                          | Exclusion Criteria                                                                                                                                                                             |
|---------------|-------------------------------------------------------------------------------------------------------------------------------------------------------------|------------------------------------------------------------------------------------------------------------------------------------------------------------------------------------------------|
| Population    | <ul style="list-style-type: none"><li>Adults (age <math>\geq 18</math>)</li><li>Patients admitted to ICU, emergency department and genral ward</li></ul>    | <ul style="list-style-type: none"><li>Age&lt;18</li><li>Non-human subjects or experimental setups not related to human healthcare.</li><li>Not focused on early prediction of sepsis</li></ul> |
| Intervention  | Any                                                                                                                                                         | No restriction                                                                                                                                                                                 |
| Comparator    | <ul style="list-style-type: none"><li>At least one classical ML or DL model used</li><li>Utilizing EHR data as the primary source of information.</li></ul> | <ul style="list-style-type: none"><li>No ML/DL model</li><li>Clinical investigation without the application of ML/DL model</li><li>Do not utilize EHRs as a data source.</li></ul>             |
| Outcomes      | <ul style="list-style-type: none"><li>Early prediction of sepsis</li></ul>                                                                                  | <ul style="list-style-type: none"><li>Mortality prediction</li></ul>                                                                                                                           |
| Study designs | <ul style="list-style-type: none"><li>Retrospective or prospective study</li><li>Sample size (&gt;50)</li></ul>                                             | <ul style="list-style-type: none"><li>Studies that focus only on using clinical notes.</li><li>Do not report on performance metrics for machine learning models</li></ul>                      |

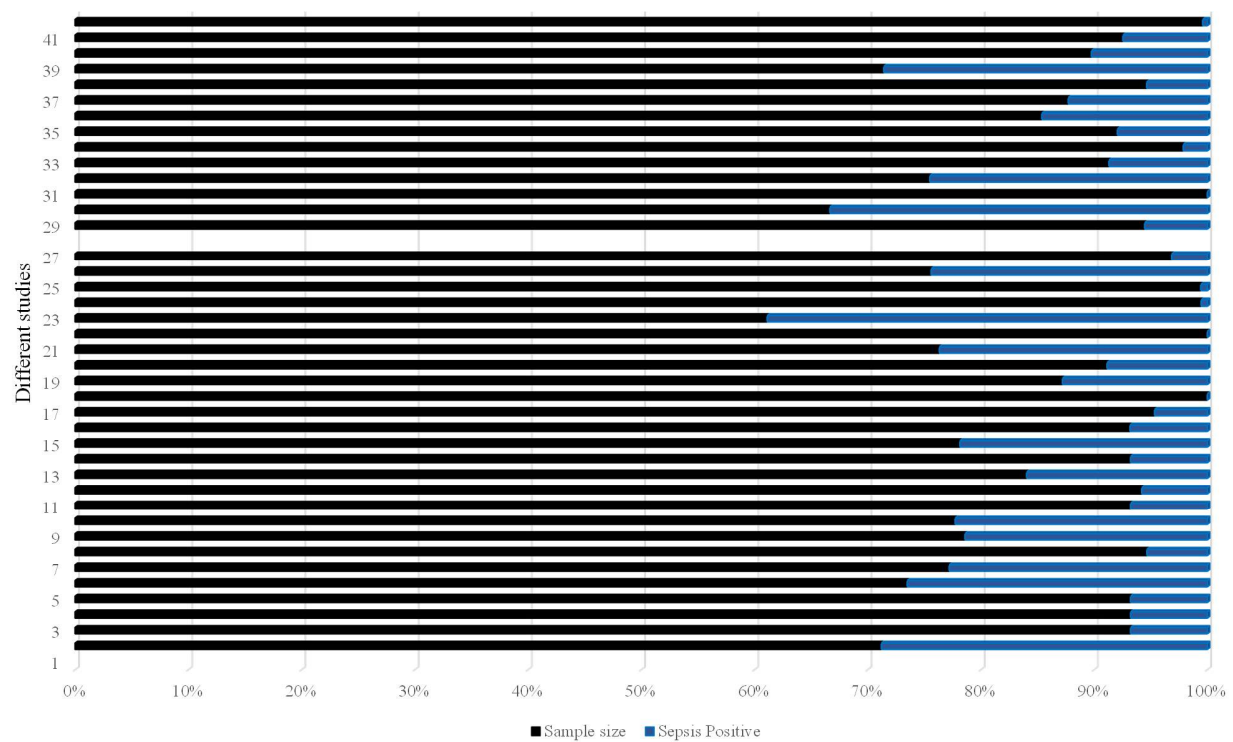

**Supplementary Figure S1.** Visual representation of sample size and sepsis-positive patient numbers and percentage. Note: Studies # 1 and 28 were removed while plotting this figure as these datasets are outliers, and including these two studies would make the plot non-representative to most of the studies.

**Supplementary Table S5:** Summary of systematic review and meta-analysis in the literature

| SN | References               | Journal                                                 | Journal Impact Factor | Journal H-index | Citations | Number of articles Reported |
|----|--------------------------|---------------------------------------------------------|-----------------------|-----------------|-----------|-----------------------------|
| 1  | Jahandideh et al. (2023) | International Journal of Medical Informatics            | 4.9                   | 122             | 0         | 29                          |
| 2  | Deng et al. (2022)       | Iscience                                                | 5.75                  | 61              | 14        | 21                          |
| 3  | Yan et al. (2022)        | Journal of the American Medical Informatics Association | 7.942                 | 169             | 15        | 9                           |
| 4  | Giacobbe et al. (2021)   | Frontiers in medicine                                   | 3.9                   | 71              | 27        | 43                          |
| 5  | Moor et al. (2021)       | Frontiers in medicine                                   | 3.9                   | 71              | 76        | 21                          |
| 6  | Fleuren et al. (2020)    | Intensive care medicine                                 | 38.9                  | 219             | 290       | 24                          |

|   |                           |                                                       |     |     |     |    |
|---|---------------------------|-------------------------------------------------------|-----|-----|-----|----|
| 7 | Islam et al.<br>(2019)    | Computer<br>methods and<br>programs in<br>biomedicine | 6.1 | 124 | 149 | 7  |
| 8 | Schinkel et al.<br>(2019) | Computers in<br>biology and<br>medicine               | 7.7 | 113 | 75  | 25 |

Note: Google scholar is used for citation information
